# Supplementary material
Source: HighWire-hosted journal article supplement (https://erj.ersjournals.com/content/58/2/2003358)
Supplement: inline-supplementary-material-1 [file inline-supplementary-material-1.pdf]

## **Supplementary appendix**

### *Collection of baseline data*

We used standardised forms to record the following information: demographic data; medical history, including age at sarcoidosis onset; physical findings; World Health Organisation functional class; routine blood test results; 6-minute walking distance(1); and most recent PFT results before lung transplantation including forced vital capacity (FVC), forced (2) expiratory volume in 1 s (FEV1), and diffusing capacity for carbon monoxide (DLCO), measured according to established protocols and reported as percent of predicted values.

PH was sought during right heart catheterisation and defined as mean pulmonary artery pressure  $>20$  mm Hg, pulmonary capillary wedge pressure  $\leq 15$  mm Hg, and pulmonary vascular resistance  $>3$ WU in the absence of other known causes of PH (3). Severe PH (sPH) was defined as follow: mean pulmonary artery pressure  $\geq 35$  mm Hg or as mean pulmonary artery pressure  $\geq 25$  mm Hg with a cardiac index  $\leq 2.0$  L/min/m<sup>2</sup>(4).

### *Thoracic CT protocol and review*

All patients were scanned in the supine position from the lung apices to the lung bases at full suspended inspiration using standard exposure parameters (90 mA and 120kVp). All images were anonymised and reviewed independently by two thoracic radiologists or one thoracic radiologist and one pulmonologist working independently of each other and using standard window settings for lung parenchyma visualisation.

The readers had no knowledge of pulmonary function data or other clinical indicators of disease severity. The presence and extent of the following patterns, based on the Fleischner Society's glossary of terms for thoracic imaging (5) with some minor modifications were

Supplemental Figure S1: CT scoring sheet.

**Patient** enter patient id

**Date of CT**

**More information** <https://doi.org/10.1148/radiol.246207012>

**Legend: 0 = none or minimal, 1 = moderate (<10%), 2 = severe (10-30%), 3 = very severe (>30%)**

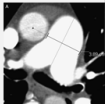








**axial CT image AAD and mPAD measured along the line that originates from the center of the Aa and passes perpendicular to the long axis of the main PA, at the level of the PA bifurcation on axial section**

**axial CT image AAD and mPAD measured along the line that originates from the center of the Aa and passes perpendicular to the long axis of the main PA, at the level of the PA bifurcation on axial section**

collection of innumerable small linear opacities that, by summation, produce an appearance resembling a ring shadows, typically 3–10 mm in diameter

few areas or regions of low attenuation, usually without visible walls

rounded focal lucency or area of decreased attenuation, 1 cm or more in diameter, bounded by a thin wall

increased opacity of lung, with preservation of bronchovascular markings

homogeneous increase in pulmonary parenchymal attenuation that obscures the margins of vessels and airway walls

bronchial dilatation with respect to the accompanying pulmonary artery (signet ring sign), lack of splitting of bronchi, and identification of bronchi within 1 cm of the pleural surface

| Items to classify patients     |                             |              |               |            |               |                        |                                                         |                          |                                 |                                                |  |
|--------------------------------|-----------------------------|--------------|---------------|------------|---------------|------------------------|---------------------------------------------------------|--------------------------|---------------------------------|------------------------------------------------|--|
| axial view Diameter Aorta (mm) | axial view Diameter PA (mm) | reticulation | honey combing | emphysema  | bullae (>1cm) | ground glass opacities | central consolidation masses with or without distortion | peripheral consolidation | bronchiectasis (incl. traction) | cavity with solid material (e.g. aspergilloma) |  |
|                                |                             | low mid up   | low mid up    | low mid up | low mid up    | low mid up             | low mid up                                              | low mid up               | low mid up                      | low mid up                                     |  |

data entry->

| axial view Diameter Aorta | axial view Diameter PA | reticulation | honey combing | emphysema | bullae (>1cm) | ground glass | central | peripheral | bronchiectasis | cavity with solid |    |
|---------------------------|------------------------|--------------|---------------|-----------|---------------|--------------|---------|------------|----------------|-------------------|----|
| low                       | mid                    | up           | low           | mid       | up            | low          | mid     | up         | low            | mid               | up |

### *Patient management*

Most of the patients with sPH were transplanted with intraoperative veno-arterial ECMO. ECMO was switched prophylactically from its central location to peripheral cannulation after implantation of the lungs. Patients were cannulated in the groin, and the ECMO device used intraoperatively was connected. A Swan-Ganz catheter and transthoracic echocardiography were used to measure pulmonary artery pressures, assess cardiac function, and monitor the adequacy of fluid management and adrenergic support. ECMO flow was kept at a low level, usually about half the normal cardiac output. ECMO remained in place until the patients were haemodynamically stable and had normal chest X-ray findings, adequate oxygenation (fraction of inspired oxygen  $<0.5$ ), a low ventilation pattern and, most importantly, a normal fluid balance, i.e., removal of the excessive fluid load (no oedema or ascites).

Primary graft dysfunction (PGD) grade was assessed prospectively, using the International Society for Heart and Lung Transplantation criteria, defined by the  $\text{PaO}_2/\text{FiO}_2$  ratio and the presence of infiltrates within the allograft or allografts (7).

Post-transplantation immunosuppression and induction therapy were given according to local guidelines at each centre. All patients received life-long *Pneumocystis jirovecii* pneumonia prophylaxis with cotrimoxazole. Valganciclovir for cytomegalovirus prophylaxis was given according to local guidelines. Monitoring transbronchial biopsies were obtained routinely or as clinically indicated depending on the standard protocol at each centre. Patients with allograft dysfunction were investigated for acute cellular rejection, lymphocytic bronchiolitis/neutrophilic reversible allograft dysfunction, and airway injury caused by infection/colonisation. CLAD was diagnosed based on international criteria when  $\text{FEV}_1$  and/or FVC declined to  $\leq 80\%$  of the best postoperative value (8) during routine outpatient assessments after a minimum of 3 months post-lung transplantation. Comprehensive PFTs

including spirometry and lung volume measurements, HRCT of the chest, and bronchoscopy with bronchoalveolar lavage and transbronchial biopsy were performed to look for causes of lung allograft dysfunction, including persistent acute rejection, azithromycin-responsive allograft dysfunction, infection, anastomotic stricture, and sarcoidosis recurrence.

Figure S3: Main features of the overall population according to inclusion/exclusion status

|                                                                      | Overall<br>n = 166            | Included<br>n = 112          | Excluded<br>n = 54        | P* value |
|----------------------------------------------------------------------|-------------------------------|------------------------------|---------------------------|----------|
| Male, n (%)                                                          | 102 (61)                      | 71 (64)                      | 31 (57)                   | 0.57     |
| Recipient age, med [IQR]                                             | 51 [44 - 57]                  | 52 [46 - 59]                 | 46 [40 - 53]              | <0.01    |
| Body mass index, kg/m <sup>2</sup> med [IQR]                         | 22 [20 - 26]                  | 23 [20 - 26]                 | 22 [16 - 34]              | 0.51     |
| Caucasian, n (%)                                                     | 141 (85)                      | 92 (82)                      | 49 (91)                   | 0.49     |
| Smoker, med [IQR]                                                    | 5 [0 - 18]                    | 6 [0 - 19]                   | 1.5 [0 - 16]              | 0.26     |
| Extrathoracic sarcoidosis, 0/1/2/3, n (%) n/165                      | 137 (83)/26 (15) /1 (1)/1 (1) | 90 (80)/20 (18) /1 (1)/1 (1) | 47 (89)/6 (11)/0/0        | 0.71     |
| History of pulmonary aspergillosis, n (%), n / 155                   | 25 (18)                       | 18 (19)                      | 7 (16)                    | 0.87     |
| Blood group, O/A/B/AB, %                                             | 40 / 43 / 14 / 3              | 39 / 44 / 16 / 1             | 43 / 43 / 11 / 3          | 0.54     |
| Lung transplantation delay, d, med [IQR]                             | 88 [25 - 283]                 | 92 [27 - 299]                | 76 [19 - 245]             | 0.29     |
| Lung transplantation procedure DLT/HLT/SLT, n (%)                    | 139 (84) / 6 (4) / 21 (12)    | 101 (90) / 3 (3) / 8 (6)     | 38 (70) / 3 (6) / 13 (24) | 0.04     |
| High-emergency transplant programme, n (%)                           | 27 (16)                       | 17 (15)                      | 10 (19)                   | 0.74     |
| Cardiopulmonary bypass, n (%), n / 161                               | 71 (44)                       | 54 (50)                      | 17 (33)                   | 0.07     |
| Right ischaemic time, min, med [IQR], n / 86                         | 288 [238 – 378]               | 300 [240 – 372]              | 285 [204 – 390]           | 0.69     |
| Left ischaemic time, min, med [IQR], n / 65                          | 360 [300 – 401]               | 360 [300 – 395]              | 376 [312 – 405]           | 0.61     |
| Induction, n (%), n / 123                                            | 49 (38)                       | 28 (34)                      | 21 (48)                   | 0.18     |
| Dialysis during intensive care unit stay n (%), n / 144              | 21 (14)                       | 14 (14)                      | 7 (15)                    | 0.99     |
| Primary graft dysfunction score Grade 3 at 72 hours, n (%) , n / 159 | 33 (21)                       | 24 (22)                      | 9 (19)                    | 0.84     |
| Ventilation time during intensive care unit stay, med [IQR], n / 153 | 3 [1 - 17]                    | 2 [1 - 19]                   | 3 [1 - 11]                | 0.95     |
| Haemothorax, n (%), n / 127                                          | 26 (20)                       | 16 (18)                      | 10 (26)                   | 0.41     |
| Pulmonary sarcoidosis recurrence, n (%), n / 119                     | 11 (9)                        | 11 (14)                      | 0                         | 0.03     |
| Chronic lung allograft dysfunction at last follow-up, n (%), n / 159 | 61 (38)                       | 33 (31)                      | 28 (54)                   | 0.01     |
| In-hospital mortality, n(%)                                          | 22 (13)                       | 18 (16)                      | 4 (7)                     | 0.35     |
| Retransplantation, n (%)                                             | 4 (2)                         | 3 (3)                        | 1 (2)                     | 0.67     |

1. Guyatt GH, Sullivan MJ, Thompson PJ, Fallen EL, Pugsley SO, Taylor DW, Berman LB. The 6-minute walk: a new measure of exercise capacity in patients with chronic heart failure. *Can Med Assoc J* 1985;132:919–923.
2. Miller MR, Hankinson J, Brusasco V, Burgos F, Casaburi R, Coates A, Crapo R, Enright P, van der Grinten CPM, Gustafsson P, Jensen R, Johnson DC, MacIntyre N, McKay R, Navajas D, Pedersen OF, Pellegrino R, Viegi G, Wanger J, ATS/ERS Task Force. Standardisation of spirometry. *Eur Respir J* 2005;26:319–338.
3. Simonneau G, Montani D, Celermajer DS, Denton CP, Gatzoulis MA, Krowka M, Williams PG, Souza R. Haemodynamic definitions and updated clinical classification of pulmonary hypertension. *Eur Respir J* 2019;53:.
4. Nathan SD, Barbera JA, Gaine SP, Harari S, Martinez FJ, Olschewski H, Olsson KM, Peacock AJ, Pepke-Zaba J, Provencher S, Weissmann N, Seeger W. Pulmonary hypertension in chronic lung disease and hypoxia. *Eur Respir J* 2019;53:1801914.
5. Hansell DM, Bankier AA, MacMahon H, McLoud TC, Müller NL, Remy J. Fleischner Society: glossary of terms for thoracic imaging. *Radiology* 2008;246:697–722.
6. Abehsera M, Valeyre D, Grenier P, Jaillet H, Battesti JP, Brauner MW. Sarcoidosis with pulmonary fibrosis: CT patterns and correlation with pulmonary function. *AJR Am J Roentgenol* 2000;174:1751–1757.
7. Snell GI, Yusef RD, Weill D, Strueber M, Garrity E, Reed A, Pelaez A, Whelan TP, Perch M, Bag R, Budev M, Corris PA, Crespo MM, Witt C, Cantu E, Christie JD. Report of the ISHLT Working Group on Primary Lung Graft Dysfunction, part I: Definition and grading-A 2016 Consensus Group statement of the International Society for Heart and Lung Transplantation. *J Heart Lung Transplant* 2017;36:1097–1103.
8. Verleden GM, Raghu G, Meyer KC, Glanville AR, Corris P. A new classification system for chronic lung allograft dysfunction. *J Heart Lung Transplant* 2014;33:127–133.
