# Supplementary material
Source: HighWire-hosted journal article supplement (https://erj.ersjournals.com/content/58/2/2003358)
Supplement: inline-supplementary-material-2 [file inline-supplementary-material-2.pdf]

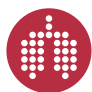

# Lung transplantation for sarcoidosis: outcome and prognostic factors

SHAREABLE PDF

Jérôme Le Pavec<sup>1,2,3</sup>, Dominique Valeyre<sup>4,5,26</sup>, Pierre Gazengel<sup>1,2,3,26</sup>, Are M. Holm<sup>6,27</sup>, Hans Henrik Schultz<sup>7,27</sup>, Michael Perch<sup>7</sup>, Aurélie Le Borgne<sup>8</sup>, Martine Reynaud-Gaubert<sup>9</sup>, Christiane Knoop<sup>10</sup>, Laurent Godinas<sup>11</sup>, Sandrine Hirschi<sup>12</sup>, Vincent Bunel<sup>13</sup>, Rosalia Laporta<sup>14</sup>, Sergio Harari<sup>15</sup>, Elodie Blanchard<sup>16</sup>, Jesper M. Magnusson<sup>17</sup>, Adrien Tissot<sup>18</sup>, Jean-François Mornex<sup>19,20</sup>, Clément Picard<sup>21</sup>, Laurent Savale<sup>16,23,22</sup>, Jean-François Bernaudin<sup>23</sup>, Pierre-Yves Brillet<sup>24</sup>, Hilario Nunes<sup>4</sup>, Marc Humbert<sup>16,23,22</sup>, Elie Fadel<sup>1,2,3</sup> and Jens Gottlieb<sup>15</sup>

<sup>1</sup>Service de Chirurgie Thoracique, Vasculaire et Transplantation Cardio-pulmonaire, Hôpital Marie-Lannelongue, Le Plessis-Robinson, France. <sup>2</sup>Université Paris-Sud, Faculté de Médecine, Université Paris-Saclay, Le Kremlin Bicêtre, France. <sup>3</sup>UMR\_S 999, Université Paris-Sud, INSERM, Hôpital Marie Lannelongue, Le Plessis Robinson, France. <sup>4</sup>INSERM UMR 1272, Université Sorbonne Paris Nord, AP-HP, Hôpital Avicenne Service de Pneumologie, Bobigny, France. <sup>5</sup>Groupe Hospitalier Paris Saint Joseph, Paris, France. <sup>6</sup>Dept of Respiratory Medicine, Oslo University Hospital and Institute for Clinical Medicine University of Oslo, Oslo, Norway. <sup>7</sup>Dept of Cardiology, Section for Lung Transplantation, Copenhagen University Hospital, Rigshospitalet, Copenhagen, Denmark. <sup>8</sup>Pôle des voies respiratoires-Hôpital Larrey, Centre Hospitalo-Universitaire, Toulouse, France. <sup>9</sup>Service de Pneumologie et Equipe de Transplantation Pulmonaire, Centre Hospitalo-Universitaire Nord, Assistance Publique-Hôpitaux de Marseille, Aix-Marseille Université, Marseille, France. <sup>10</sup>Brussels Lung Transplant Program, Dept of Chest Medicine, Erasme University, Brussels, Belgium. <sup>11</sup>Dept of Respiratory Diseases, University Hospitals Leuven, Leuven, Belgium. <sup>12</sup>Service de Pneumologie, Groupe de Transplantation Pulmonaire, Hopitaux Universitaires de Strasbourg, Strasbourg, France. <sup>13</sup>AP-HP, Service de Pneumologie, Hôpital Bichat, Paris, France. <sup>14</sup>Pneumology Dept, Hospital Universitario Puerta de Hierro, Madrid, Spain. <sup>15</sup>Dept of Medical Sciences San Giuseppe Hospital MultiMedica IRCCS and Dept of Clinical Sciences and Community Health, Università degli Studi di Milano, Milan, Italy. <sup>16</sup>Dept of Respiratory Medicine, Haut-Lévêque Hospital, Bordeaux University, Pessac, France. <sup>17</sup>Dept of Internal Medicine/Respiratory Medicine and Allergology, Institute of Medicine, University of Gothenburg, Gothenburg, Sweden. <sup>18</sup>Service de Pneumologie, L'institut du thorax, Centre hospitalo-universitaire de Nantes, Nantes, France. <sup>19</sup>Université de Lyon, INRA, IVPC, Lyon, France. <sup>20</sup>Hospices Civils de Lyon, Lyon, France. <sup>21</sup>Service de Pneumologie, Hôpital Foch, Suresnes, France. <sup>22</sup>AP-HP, Service de Pneumologie, Hôpital Kremlin Bicêtre, Kremlin Bicêtre, France. <sup>23</sup>INSERM UMR 1272, Université Sorbonne Paris Nord, Bobigny and Sorbonne Université Paris, Paris, France. <sup>24</sup>INSERM U1272, Université Paris Sorbonne Nord, AP-HP, Service de Radiologie, Hôpital Avicenne, Bobigny, France. <sup>25</sup>Dept of Respiratory Medicine, Hannover Medical School, Hanover, Germany. <sup>26</sup>These authors contributed equally to this work. <sup>27</sup>These authors contributed equally to this work.

Corresponding author: Jérôme Le Pavec ([lepavec@gmail.com](mailto:lepavec@gmail.com))

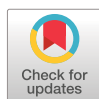

Shareable abstract (@ERSpublications)

Post-transplant survival in patients with pulmonary sarcoidosis was similar to that in patients with other indications for lung transplantation. The main factors associated with worse survival were older age and extensive pre-operative lung fibrosis. <https://bit.ly/2XBfJd6>

**Cite this article as:** Le Pavec J, Valeyre D, Gazengel P, *et al.* Lung transplantation for sarcoidosis: outcome and prognostic factors. *Eur Respir J* 2021; 58: 2003358 [DOI: 10.1183/13993003.03358-2020].

This single-page version can be shared freely online.

## Abstract

**Study question** In patients with sarcoidosis, past and ongoing immunosuppressive regimens, recurrent disease in the transplant and extrapulmonary involvement may affect outcomes of lung transplantation. We asked whether sarcoidosis lung phenotypes can be differentiated and, if so, how they relate to outcomes in patients with pulmonary sarcoidosis treated by lung transplantation.

**Patients and methods** We retrospectively reviewed data from 112 patients who met international diagnostic criteria for sarcoidosis and underwent lung or heart–lung transplantation between 2006 and 2019 at 16 European centres.

**Results** Patient survival was the main outcome measure. At transplantation, median (interquartile range (IQR)) age was 52 (46–59) years; 71 (64%) were male. Lung phenotypes were individualised as follows: 1) extended fibrosis only; 2) airflow obstruction; 3) severe pulmonary hypertension (sPH) and airflow

Copyright ©The authors 2021. For reproduction rights and permissions contact [permissions@ersnet.org](mailto:permissions@ersnet.org)

This article has supplementary material available from [erj.ersjournals.com](http://erj.ersjournals.com)

Received: 2 Sept 2020  
Accepted: 25 Dec 2020

obstruction; 4) sPH, airflow obstruction and fibrosis; 5) sPH and fibrosis; 6) airflow obstruction and fibrosis; 7) sPH; and 8) none of these criteria, in 17%, 16%, 17%, 14%, 11%, 9%, 5% and 11% of patients, respectively. Post-transplant survival rates after 1, 3, and 5 years were 86%, 76% and 69%, respectively. During follow-up (median (IQR) 46 (16–89) months), 31% of patients developed chronic lung allograft dysfunction. Age and extended lung fibrosis were associated with increased mortality. Pulmonary fibrosis predominating peripherally was associated with short-term complications.

**Answer to the study question** Post-transplant survival in patients with pulmonary sarcoidosis was similar to that in patients with other indications for lung transplantation. The main factors associated with worse survival were older age and extensive pre-operative lung fibrosis.
